# Supplementary material for: Short-Term Effectiveness and Safety of Biologics and Small Molecule Drugs for Moderate to Severe Atopic Dermatitis: A Systematic Review and Network Meta-Analysis
Source: MDPI journal article supplement (doi:10.3390/life11090927), 2021-09-06
Supplement: s1 [file s1]

Table S2. SUCRA and probability of each drug for the different variables studied in the NMA

## a) Monotherapy

|             | EASI 75 |           | IGA 0/1 |           | EASI 90 |           | NRS P |           | ANY AE |         | UPPER TRACT INFECTION |         | SEVERE AE |         | WITHDRAWN |         |
|-------------|---------|-----------|---------|-----------|---------|-----------|-------|-----------|--------|---------|-----------------------|---------|-----------|---------|-----------|---------|
|             | SUCRA   | Prob Best | SUCRA   | Prob Best | SUCRA   | Prob Best | SUCRA | Prob Best | SUCRA  | Prob AE | SUCRA                 | Prob AE | SUCRA     | Prob AE | SUCRA     | Prob AE |
| ABRO100     | 0.55    | 0.00      | 0.50    | 0.00      | 0.42    | 0.00      | 0.35  | 0.00      | 0.71   | 0.04    | 0.58                  | 0.10    | 0.64      | 0.08    | 0.17      | 0.00    |
| ABRO200     | 0.85    | 0.06      | 0.77    | 0.01      | 0.76    | 0.03      | 0.69  | 0.02      | 0.91   | 0.48    | 0.36                  | 0.02    | 0.73      | 0.18    | 0.15      | 0.00    |
| BARI2       | 0.25    | 0.00      | 0.27    | 0.00      | 0.22    | 0.00      | 0.35  | 0.00      | 0.41   | 0.00    | 0.63                  | 0.19    | 0.11      | 0.00    | 0.62      | 0.01    |
| BARI4       | 0.40    | 0.00      | 0.44    | 0.00      | 0.42    | 0.00      | 0.68  | 0.04      | 0.33   | 0.00    | 0.62                  | 0.19    | 0.04      | 0.00    | 0.50      | 0.00    |
| DUPI300Q2W  | 0.63    | 0.00      | 0.65    | 0.00      | 0.60    | 0.00      | 0.53  | 0.00      | 0.29   | 0.00    | 0.30                  | 0.01    | 0.31      | 0.00    | 0.54      | 0.00    |
| LEBRI250Q2W | 0.59    | 0.01      | 0.63    | 0.04      | 0.75    | 0.15      | 0.65  | 0.15      | 0.80   | 0.37    | 0.17                  | 0.05    | 0.61      | 0.21    | 0.74      | 0.03    |
| NEMO60Q4W   | 0.12    | 0.00      | 0.09    | 0.00      | 0.17    | 0.00      | 0.32  | 0.01      | 0.31   | 0.02    | .                     | .       | 0.73      | 0.34    | 0.99      | 0.96    |
| PBO         | 0.01    | 0.00      | 0.05    | 0.00      | 0.02    | 0.00      | 0.00  | 0.00      | 0.27   | 0.00    | 0.35                  | 0.00    | 0.63      | 0.01    | 0.58      | 0.00    |
| TRALO300Q2W | 0.29    | 0.00      | 0.25    | 0.00      | 0.35    | 0.00      | 0.18  | 0.00      | 0.16   | 0.00    | 0.55                  | 0.08    | 0.74      | 0.14    | 0.51      | 0.00    |
| UPA15       | 0.83    | 0.00      | 0.86    | 0.00      | 0.82    | 0.00      | 0.78  | 0.01      | 0.54   | 0.00    | 0.65                  | 0.07    | 0.35      | 0.00    | 0.31      | 0.00    |
| UPA30       | 0.99    | 0.93      | 0.99    | 0.95      | 0.98    | 0.81      | 0.97  | 0.79      | 0.78   | 0.09    | 0.80                  | 0.28    | 0.61      | 0.05    | 0.41      | 0.00    |

## b) Association with topical corticosteroids (TCS)

|                | EASI 75 |           | IGA 0/1 |           | EASI 90 |           | NRS P |           | ANY AE |         | UPPER TRACT INFECTION |         | SEVERE AE |         | WITHDRAWN |         |
|----------------|---------|-----------|---------|-----------|---------|-----------|-------|-----------|--------|---------|-----------------------|---------|-----------|---------|-----------|---------|
|                | SUCRA   | Prob Best | SUCRA   | Prob Best | SUCRA   | Prob Best | SUCRA | Prob Best | SUCRA  | Prob AE | SUCRA                 | Prob AE | SUCRA     | Prob AE | SUCRA     | Prob AE |
| ABRO100TCS     | 0.57    | 0.01      | 0.55    | 0.00      | .       | .         | .     | .         | 0.28   | 0.00    | .                     | .       | 0.60      | 0.01    | 0.36      | 0.00    |
| ABRO200TCS     | 0.82    | 0.12      | 0.83    | 0.05      | .       | .         | .     | .         | 0.69   | 0.08    | .                     | .       | 0.26      | 0.00    | 0.49      | 0.00    |
| BARI2TCS       | 0.28    | 0.00      | 0.24    | 0.00      | 0.25    | 0.00      | 0.36  | 0.01      | 0.72   | 0.02    | 0.75                  | 0.33    | 0.40      | 0.00    | 0.39      | 0.00    |
| BARI4TCS       | 0.39    | 0.00      | 0.42    | 0.00      | 0.46    | 0.00      | 0.58  | 0.05      | 0.94   | 0.62    | 0.69                  | 0.19    | 0.80      | 0.01    | 0.73      | 0.01    |
| DUPI300Q2WTCS  | 0.73    | 0.02      | 0.66    | 0.00      | 0.77    | 0.06      | 0.68  | 0.09      | 0.32   | 0.00    | 0.51                  | 0.24    | 0.43      | 0.00    | 0.29      | 0.00    |
| NEMO30Q4WTCS   | .       | .         | .       | .         | .       | .         | .     | .         | 0.61   | 0.19    | .                     | .       | 0.99      | 0.97    | 0.99      | 0.97    |
| PBOTCS         | 0.04    | 0.00      | 0.02    | 0.00      | 0.02    | 0.00      | 0.03  | 0.00      | 0.23   | 0.00    | 0.46                  | 0.01    | 0.61      | 0.00    | 0.59      | 0.00    |
| TEZE280Q2WTCS  | 0.14    | 0.00      | 0.25    | 0.00      | .       | .         | .     | .         | 0.25   | 0.02    | 0.07                  | 0.00    | 0.44      | 0.00    | 0.40      | 0.00    |
| TRALO300Q2WTCS | 0.34    | 0.00      | 0.26    | 0.00      | 0.31    | 0.00      | 0.20  | 0.01      | 0.37   | 0.01    | 0.55                  | 0.09    | 0.14      | 0.00    | 0.38      | 0.00    |
| UPA15TCS       | 0.73    | 0.02      | 0.77    | 0.01      | 0.71    | 0.02      | 0.71  | 0.07      | 0.42   | 0.01    | 0.46                  | 0.06    | 0.50      | 0.00    | 0.44      | 0.00    |
| UPA30TCS       | 0.97    | 0.83      | 0.99    | 0.94      | 0.98    | 0.92      | 0.93  | 0.77      | 0.67   | 0.06    | 0.51                  | 0.08    | 0.32      | 0.00    | 0.44      | 0.00    |

ABRO100: Abrocitinib 100 mg daily; ABRO200: Abrocitinib 200 mg daily; BARI2: Baricitinib 2 mg daily; BARI4: Baricitinib 4 mg daily; DUPI300Q2W: Dupilumab 300 mg every other week; LEBRI250Q2W: Lebrikizumab 250 mg every other week; NEMO60Q4W: Nemolizumab 60 mg every 4 weeks; PBO: Placebo; TEZE280Q2W: Tezepalumab 280 mg every other week;

TRALO300Q2W: Tralokinumab 300 mg every other week; UPA15: Upadacitinib 15 mg daily;  
UPA30: Upadacitinib 30 mg daily.

SUCRA: surface under the cumulative ranking curve; prob: probability; NRSP; numerical rating scale for pruritus; AE: adverse event
