# Supplementary material for: Short-Term Effectiveness and Safety of Biologics and Small Molecule Drugs for Moderate to Severe Atopic Dermatitis: A Systematic Review and Network Meta-Analysis
Source: MDPI journal article supplement (doi:10.3390/life11090927), 2021-09-06
Supplement: s1 [file s1]

Supplementary material Table S1. Data extracted from the studies included in the NMA

| Study # | StudyID              | AgentID                   | n   | EASI 50 (n) | EASI 75 (n)     | EASI 90 (n)     | EASI 100 | Adjusted Mean DLQI (SD) | IGA =0/1 | 4-point improvement itch semana 16f | At least one AE | At least one serious AE | At least one infectious AE | Upper respiratory tract | MACEs | Withdrawal due to AE |
|---------|----------------------|---------------------------|-----|-------------|-----------------|-----------------|----------|-------------------------|----------|-------------------------------------|-----------------|-------------------------|----------------------------|-------------------------|-------|----------------------|
| 1       | SIMPSON SOLO-1[1]    | Placebo                   | 224 | 55          | 33              | 17              | NR       | -5.3(0.5)               | 23       | 26/212                              | 145             | 11                      | 63                         | 5                       | NR    | 2                    |
|         |                      | Dupilumab 300 mg Q2W      | 224 | 154         | 115             | 80              | NR       | -9.3(0.4)               | 85       | 87/213                              | 167             | 7                       | 80                         | 6                       | NR    | 4                    |
|         |                      | Dupilumab 300 mg Q1W      | 223 | 136         | 117             | 74              | NR       | -9.0(0.4)               | 83       | 81/201                              | 150             | 2                       | 74                         | 11                      | NR    | 4                    |
| 2       | SIMPSON SOLO-2[1]    | Placebo                   | 236 | 52          | 28              | 17              | NR       | -3.6(0.5)               | 20       | 21/221                              | 168             | 13                      | 76                         | 5                       | NR    | 5                    |
|         |                      | Dupilumab 300 mg Q2W      | 233 | 152         | 103             | 70              | NR       | -9.3(0.4)               | 84       | 81/225                              | 154             | 4                       | 65                         | 7                       | NR    | 2                    |
|         |                      | Dupilumab 300 mg Q1W      | 239 | 146         | 115             | 73              | NR       | -9.5(0.4)               | 87       | 89/228                              | 157             | 8                       | 68                         | 9                       | NR    | 3                    |
| 3       | THAÇI[2]             | Dupilumab 300 mg QW       | 63  | 52          | 38 <sup>a</sup> | 23 <sup>a</sup> | NR       | NR                      | 21       | NR                                  | 53              | 1                       | NR                         | 5                       | NR    | 1                    |
|         |                      | Dupilumab 300 mg Q2W      | 64  | 50          | 34              | 19              | NR       | NR                      | 19       | NR                                  | 50              | 2                       | NR                         | 6                       | NR    | 4                    |
|         |                      | Placebo                   | 61  | 18          | 7               | 1               | NR       | NR                      | 1        | NR                                  | 49              | 4                       | NR                         | 11                      | NR    | 3                    |
|         |                      | Dupilumab 200 mg Q2W      | 61  | 38          | 34              | 19              | NR       | NR                      | 17       | NR                                  | 46              | 1                       | NR                         | 2                       | NR    | 3                    |
|         |                      | Dupilumab 300 mg Q4W      | 65  | 46          | 32              | 19              | NR       | NR                      | 14       | NR                                  | 56              | 3                       | NR                         | 5                       | NR    | 3                    |
|         |                      | Dupilumab 100 mg Q4W      | 65  | 29          | 19              | 10              | NR       | NR                      | 8        | NR                                  | 53              | 5                       | NR                         | 5                       | NR    | 10                   |
| 4       | BLAUVELT CHRONOS[3]  | Placebo+TCS               | 315 | 118         | 73              | 35              | NR       | -5.3(0.31)              | 39       | 59/299                              | 214             | 6                       | NR                         | NR                      | NR    | 15                   |
|         |                      | Dupilumab 300 mg Q2W +TCS | 106 | 85          | 73              | 42              | NR       | -9.7(0.51)              | 41       | 60/102                              | 81              | 3                       | NR                         | NR                      | NR    | 1                    |
|         |                      | Dupilumab 300 mg QW +TCS  | 319 | 249         | 204             | 138             | NR       | -10.5(0.30)             | 125      | 150/295                             | 227             | 4                       | NR                         | NR                      | NR    | 8                    |
| 5       | RUZICKA[4]           | placebo                   | 53  | 16          | 8               | NR              | NR       | NR                      | NR       | NR                                  | 36              | 1                       | NR                         | 6                       | NR    | 1                    |
|         |                      | Nemolizumab 0.1mg/kg Q4W  | 53  | 50          | 15              | NR              | NR       | NR                      | NR       | NR                                  | 38              | 1                       | NR                         | 4                       | NR    | 5                    |
|         |                      | Nemolizumab 0.5mg/kg Q4W  | 54  | 24          | 17              | NR              | NR       | NR                      | NR       | NR                                  | 36              | 0                       | NR                         | 1                       | NR    | 3                    |
|         |                      | Nemolizumab 2.0mg/kg Q4W  | 52  | 21          | 10              | NR              | NR       | NR                      | NR       | NR                                  | 40              | 2                       | NR                         | 4                       | NR    | 4                    |
|         |                      | Nemolizumab 2.0mg/kg Q8W  | 52  | NR          | NR              | NR              | NR       | NR                      | NR       | NR                                  | 37              | 2                       | NR                         | 5                       | NR    | 3                    |
| 6       | BRUIN-WELLER CAFE[5] | Placebo+TCS               | 108 | 47          | 32              | 13              | NR       | -4.5(0.49)              | 15       | 13/91                               | 75              | 2                       | 44                         | 1                       | NR    | 1                    |
|         |                      | Dupilumab 300 mg Q2W +TCS | 107 | 91          | 67              | 49              | NR       | -9.5(0.46)              | 43       | 43/94                               | 77              | 2                       | 49                         | 1                       | NR    | 0                    |
|         |                      | Dupilumab 300 mg QW +TCS  | 110 | 94          | 65              | 41              | NR       | -8.8(0.45)              | 43       | 38/94                               | 76              | 2                       | 47                         | 3                       | NR    | 2                    |
| 7       | SIMPSON[6]           | Placebo+TCS               | 56  | 30          | 11              | NR              | NR       | NR                      | 7        | NR                                  | 40              | 3                       | NR                         | 7                       | NR    | 4                    |
|         |                      | Tezepelumab 280Q2W +TCS   | 55  | 36          | 13              | NR              | NR       | NR                      | 11       | NR                                  | 38              | 2                       | NR                         | 1                       | NR    | 2                    |
| 8       | WOLLENBERG[7]        | Placebo+TCS               | 51  | LOCF        | LOCF            | NR              | NR       | NR                      | 6        | NR                                  | 31              | 1                       | NR                         | 5                       | NR    | 5                    |
|         |                      | Tralokinumab 450Q2W +TCS  | 50  | LOCF        | LOCF            | NR              | NR       | NR                      | 6        | NR                                  | 36              | 3                       | NR                         | 5                       | NR    | 2                    |
|         |                      | Tralokinumab 150Q2W +TCS  | 51  | LOCF        | LOCF            | NR              | NR       | NR                      | 10       | NR                                  | 35              | 2                       | NR                         | 5                       | NR    | 3                    |
|         |                      | Tralokinumab 300Q2W +TCS  | 52  | LOCF        | LOCF            | NR              | NR       | NR                      | 13       | NR                                  | 30              | 0                       | NR                         | 4                       | NR    | 0                    |
| 9       | SIMPSON[8]           | Lebrikizumab 125 mg SD    | 52  | 36          | 20              | NR              | NR       | NR                      | 11       | NR                                  | 38              | 3                       | 24                         | NR                      | NR    | 1                    |
|         |                      | Lebrikizumab 250 mg SD    | 53  | 37          | 26              | NR              | NR       | NR                      | 15       | NR                                  | 39              | 0                       | 20                         | NR                      | NR    | 0                    |
|         |                      | Lebrikizumab 125 mg Q4W   | 51  | 42          | 28              | NR              | NR       | NR                      | 17       | NR                                  | 27              | 2                       | 12                         | NR                      | NR    | 2                    |
|         |                      | Placebo                   | 53  | 33          | 18              | NR              | NR       | NR                      | 10       | NR                                  | 35              | 2                       | 24                         | NR                      | NR    | 1                    |

|    |                              |                              |     |      |     |        |    |                         |     |         |     |    |    |    |    |    |
|----|------------------------------|------------------------------|-----|------|-----|--------|----|-------------------------|-----|---------|-----|----|----|----|----|----|
| 10 | GUTTMAN[9]                   | Placebo+TCS                  | 49  | LOCF | 10  | 3      | NR | NR                      | 4   | NR      | 24  | 0  | NR | 1  | NR | 5  |
|    |                              | Baricitinib 2 mg QD +TCS     | 37  | LOCF | 11  | 7      | NR | NR                      | 8   | NR      | 17  | 0  | NR | 0  | NR | 1  |
|    |                              | Baricitinib 4 mg QD +TCS     | 38  | LOCF | 13  | 8      | NR | NR                      | 8   | NR      | 27  | 1  | NR | 2  | NR | 5  |
| 11 | SIMPSON BREEZE-AD-1[10]      | Placebo                      | 249 | NR   | 22  | 12     | NR | NR                      | 12  | 6       | 135 | 6  | NR | 6  | 0  | 4  |
|    |                              | Baricitinib 1 mg QD          | 127 | NR   | 22  | 11     | NR | NR                      | 15  | 10      | 69  | 1  | NR | 1  | 0  | 2  |
|    |                              | Baricitinib 2 mg QD          | 123 | NR   | 23  | 13     | NR | NR                      | 14  | 12      | 71  | 0  | NR | 3  | 0  | 1  |
|    |                              | Baricitinib 4 mg QD          | 125 | NR   | 31  | 20     | NR | NR                      | 21  | 24      | 73  | 2  | NR | 4  | 0  | 1  |
| 12 | SIMPSON BREEZE-AD-2[10]      | Placebo                      | 244 | NR   | 15  | 6      | NR | NR                      | 11  | 10      | 137 | 9  | NR | 5  | 0  | 2  |
|    |                              | Baricitinib 1 mg QD          | 125 | NR   | 16  | 8      | NR | NR                      | 11  | 6       | 66  | 9  | NR | 6  | 0  | 7  |
|    |                              | Baricitinib 2 mg QD          | 123 | NR   | 22  | 11     | NR | NR                      | 13  | 16      | 71  | 3  | NR | 5  | 0  | 3  |
|    |                              | Baricitinib 4 mg QD          | 123 | NR   | 26  | 16     | NR | NR                      | 17  | 20      | 66  | 1  | NR | 4  | 0  | 2  |
| 13 | GOODERHAM[11]                | Placebo                      | 56  | 14   | 8   | 5      | NR | NR                      | 3   | 13      | NR  | NR | 13 | 5  | NR | NR |
|    |                              | Abrocitinib 100 mg QD        | 56  | 30   | 22  | 14     | NR | NR                      | 16  | 25      | NR  | NR | 24 | 3  | NR | NR |
|    |                              | Abrocitinib 200 mg QD        | 55  | 38   | 31  | 21     | NR | NR                      | 21  | 28      | NR  | NR | 23 | 5  | NR | NR |
| 14 | SIMPSON[12]                  | Placebo                      | 64  | NR   | NR  | NR     | NR | NR                      | NR  | NR      | 30  | 0  | NR | 8  | NR | 1  |
|    |                              | Apremilast 30mg QD           | 58  | NR   | NR  | NR     | NR | NR                      | NR  | NR      | 36  | 1  | NR | 2  | NR | 2  |
|    |                              | Apremilast 40mg QD           | 63  | NR   | NR  | NR     | NR | NR                      | NR  | NR      | 44  | 2  | NR | 3  | NR | 6  |
| 15 | BLAUVELT[13]                 | Dupilumab 300mg QW           | 97  | 70   | 52  | NR     | NR | NR                      | 43  | NR      | 54  | 3  | NR | 11 | NR | 5  |
|    |                              | Placebo                      | 97  | 31   | 19  | NR     | NR | NR                      | 10  | NR      | 60  | 0  | NR | 14 | NR | 0  |
| 16 | GUTTMAN[14]                  | Placebo                      | 27  | 6    | 4   | 0      | NR | NR                      | 0   | NR      | 23  | 3  | NR | 4  | NR | 4  |
|    |                              | Dupilumab 200 mg QW          | 27  | 21   | 18  | 9      | NR | NR                      | 10  | NR      | 24  | 0  | NR | 4  | NR | 3  |
| 17 | WOLLENBERG ECZTRA-1[15]      | Placebo                      | 199 | 42   | 25  | 8      | NR | -5.0(0.59)              | 14  | 20/194  | 151 | 8  | NR | 2  | NR | 8  |
|    |                              | Tralokinumab 300 mg Q2W      | 603 | 250  | 150 | 87     | NR | -7.1(0.31)              | 95  | 119/595 | 460 | 23 | NR | 9  | NR | 20 |
| 18 | WOLLENBERG ECZTRA-2[15]      | Placebo                      | 201 | 41   | 23  | 11     | NR | -4.9(0.60)              | 22  | 19/200  | 132 | 5  | NR | 17 | NR | 3  |
|    |                              | Tralokinumab 300 mg Q2W      | 593 | 295  | 196 | 108    | NR | -8.8(0.30)              | 131 | 144/575 | 364 | 10 | NR | 59 | NR | 9  |
| 19 | SILVERBERG ECZTRA-3[16]      | Placebo+TCS                  | 127 | 73   | 45  | 27     | NR | -8.8(0.56)              | 33  | 43/126  | 84  | 4  | NR | 6  | NR | 1  |
|    |                              | Tralokinumab 300 mg Q2W +TCS | 253 | 200  | 141 | 83     | NR | -11.7(0.39)             | 98  | 113/249 | 180 | 2  | NR | 19 | NR | 6  |
| 20 | REICH BREEZE-AD-7[17]        | Placebo+TCS                  | 109 | 45   | 25  | 15     | NR | -5.6(0.6)               | 16  | 21/104  | 41  | 4  | 26 | 2  | 0  | 1  |
|    |                              | Baricitinib 2 mg QD +TCS     | 109 | 70   | 47  | 18     | NR | -7.5(0.6)               | 26  | 37/97   | 61  | 2  | 41 | 8  | 0  | 0  |
|    |                              | Baricitinib4 mg QD +TCS      | 111 | 78   | 53  | 27     | NR | -8.9(0.6)               | 34  | 44/100  | 64  | 4  | 37 | 3  | 0  | 5  |
| 21 | SIMPSON JADE-MONO-1[18]      | Placebo                      | 77  | 17   | 9   | 4/76   | NR | -4.2(-5.9 to -2.5)/60   | 6   | 11/74   | 44  | 3  | NR | 5  | NR | 7  |
|    |                              | Abrocitinib 100 mg QD        | 156 | 90   | 62  | 29/156 | NR | -7.0(-8.1 to -5.8)/121  | 37  | 55/147  | 108 | 5  | NR | 11 | NR | 9  |
|    |                              | Abrocitinib 200 mg QD        | 154 | 116  | 96  | 59/153 | NR | -9.1(-10.3 to -8.0)/119 | 67  | 84/147  | 120 | 5  | NR | 11 | NR | 9  |
| 22 | SILVERBERG JADE-MONO-2[19]   | Placebo                      | 78  | 15   | 8   | 3/77   | NR | -3.9(-5.3 to -2.4)/70   | 7   | 9/76    | 42  | 1  | NR | 3  | NR | 10 |
|    |                              | Abrocitinib 100 mg QD        | 158 | 106  | 69  | 37/155 | NR | -8.3(-9.3 to -7.3)/140  | 44  | 71/156  | 99  | 5  | NR | 14 | NR | 6  |
|    |                              | Abrocitinib 200 mg QD        | 155 | 123  | 94  | 58/154 | NR | -9.8(-10.7 to -8.8)/139 | 59  | 85/153  | 102 | 2  | NR | 5  | NR | 5  |
| 23 | BIEBER JADE COMPARE 2021[20] | Placebo+TCS                  | 131 | NR   | 40  | NR     | NR | NR                      | 17  | NR      | 70  | 5  | NR | NR | NR | 5  |
|    |                              | Abrocitinib 100 mg QD +TCS   | 238 | NR   | 144 | NR     | NR | NR                      | 83  | NR      | 121 | 6  | NR | NR | NR | 6  |
|    |                              | Abrocitinib 200 mg QD +TCS   | 226 | NR   | 160 | NR     | NR | NR                      | 107 | NR      | 140 | 2  | NR | NR | NR | 10 |
|    |                              | Dupilumab 300 mg Q2W+TCS     | 242 | NR   | 159 | NR     | NR | NR                      | 94  | NR      | 121 | 2  | NR | NR | NR | 8  |
| 24 | BIERBER BREEZE-AD-4[21]      | Placebo+TCS                  | 93  | 33   | 16  | 6      | NR | -5.0(0.8)               | 9   | 7/85    | 50  | 2  | NR | NR | 0  | 1  |

|    |                         |                           |     |    |     |     |    |           |     |         |     |   |    |    |    |    |
|----|-------------------------|---------------------------|-----|----|-----|-----|----|-----------|-----|---------|-----|---|----|----|----|----|
|    |                         | Baricitinib 1 mg QD +TCS  | 93  | 42 | 21  | 8   | NR | -6.2(0.7) | 12  | 18/78   | 58  | 4 | NR | NR | 0  | 0  |
|    |                         | Baricitinib 2 mg QD +TCS  | 185 | 95 | 52  | 19  | NR | -6.6(0.5) | 28  | 38/166  | 125 | 3 | NR | NR | 0  | 3  |
|    |                         | Baricitinib 4 mg QD +TCS  | 92  | 48 | 29  | 13  | NR | -8.0(0.7) | 20  | 29/76   | 69  | 6 | NR | NR | 0  | 1  |
| 25 | GUTTMAN[22]             | Placebo                   | 52  | 24 | 8   | 3   | NR | NR        | 5   | 6/22    | 24  | 2 | NR | 3  | NR | 1  |
|    |                         | Lebrikizumab 125 Q4W      | 73  | 41 | 27  | 16  | NR | NR        | 16  | 23/55   | 42  | 2 | NR | 6  | NR | 2  |
|    |                         | Lebrikizumab 250 Q4W      | 80  | 50 | 38  | 25  | NR | NR        | 22  | 27/57   | 39  | 0 | NR | 9  | NR | 4  |
|    |                         | Lebrikizumab 250 Q2W      | 75  | 49 | 38  | 28  | NR | NR        | 28  | 35/50   | 46  | 2 | NR | 2  | NR | 3  |
| 26 | KABASHIMA[23]           | Nemolizumab 60 mg Q4W     | 143 | 74 | 37  | 10  | NR | NR        | 8   | 46      | 101 | 3 | NR | NR | NR | 3  |
|    |                         | Placebo                   | 72  | 29 | 13  | 3   | NR | NR        | 4   | 9       | 51  | 2 | NR | NR | NR | 0  |
| 27 | SILVERBERG[24]          | Placebo+TCS               | 57  | NR | NR  | NR  | NR | NR        | NR  | NR      | 43  | 0 | 23 | NR | NR | 0  |
|    |                         | Nemolizumab 10mgQ4W +TCS  | 55  | NR | NR  | NR  | NR | NR        | NR  | NR      | 47  | 1 | 34 | NR | NR | 3  |
|    |                         | Nemolizumab 30mgQ4W +TCS  | 57  | NR | NR  | NR  | NR | NR        | NR  | NR      | 47  | 2 | 34 | NR | NR | 2  |
|    |                         | Nemolizumab 90mgQ4W +TCS  | 57  | NR | NR  | NR  | NR | NR        | NR  | NR      | 48  | 2 | 34 | NR | NR | 3  |
| 28 | GUTTMAN MEASURE-1[25]   | Upadacitinib 15 mg QD     | 281 | NR | 197 | 149 | 47 | NR        | 135 | 144/275 | 176 | 6 | NR | 25 | 0  | 4  |
|    |                         | Upadacitinib 30 mg QD     | 285 | NR | 227 | 188 | 77 | NR        | 177 | 167/279 | 209 | 8 | NR | 38 | 0  | 11 |
|    |                         | Placebo                   | 281 | NR | 46  | 23  | 5  | NR        | 24  | 32/270  | 166 | 8 | NR | 20 | 0  | 12 |
| 29 | GUTTMAN MEASURE-2[25]   | Upadacitinib 15 mg QD     | 276 | NR | 166 | 117 | 39 | NR        | 107 | 113/269 | 166 | 5 | NR | 19 | 0  | 11 |
|    |                         | Upadacitinib 30 mg QD     | 282 | NR | 206 | 165 | 53 | NR        | 147 | 166/278 | 173 | 7 | NR | 17 | 0  | 7  |
|    |                         | Placebo                   | 278 | NR | 37  | 15  | 2  | NR        | 13  | 24/267  | 146 | 8 | NR | 12 | 0  | 12 |
|    |                         |                           |     |    |     |     |    |           |     |         |     |   |    |    |    |    |
| 30 | REICH MEASURE AD Up[26] | Placebo+TCS               | 304 | NR | 80  | 40  | NR | NR        | 33  | 44/294  | 190 | 9 | NR | 22 | NR | 7  |
|    |                         | Upadacitinib 15mg QD +TCS | 300 | NR | 195 | 128 | NR | NR        | 120 | 149/288 | 200 | 7 | NR | 21 | NR | 4  |
|    |                         | Upadacitinib 30mg QD +TCS | 297 | NR | 229 | 187 | NR | NR        | 175 | 186/291 | 215 | 4 | NR | 23 | NR | 4  |

NR: Not reported; LOCF: Data published as Last observed carried forward; SD: Standard deviation; AE: adverse evento; MACE: major adverse cardiovascular events; Q2W: every other week; QW: every week; Q4W: every 4 weeks; TCS: Topical corticosteroids; SD: Single doce; QD: once a day

‡ patients with a baseline peak score of at least 4 on the numerical rating scale for pruritus

<sup>a</sup>Data from EASI75 and EASI 90 were derived by graphical visualization (numerical values were not available)

7 studies [4,7,8,12,13,14,24] were excluded from the quantitative analysis (you can see the reasons for exclusion in Table S4)

## REFERENCES

1. Simpson, EL; Bieber, T; Guttman-Yassky, E; Beck, LA; Blauvelt, A; Cork, MJ; Silverberg, JI; Deleuran, M; Kataoka, Y; Lacour, J-P; et al. Two Phase 3 Trials of Dupilumab versus Placebo in Atopic Dermatitis. *N Engl J Med* **2016**, 375, 2335–48.
2. Thaçi, D; Simpson, EL; Beck, LA; Bieber, T; Blauvelt, A; Papp, K; Soong, W; Worm, M; Szepletowski, JC; Sofen, H; et al. Efficacy and safety of dupilumab in adults with moderate-to-severe atopic dermatitis inadequately controlled by topical treatments: a randomised, placebo-controlled, dose-ranging phase 2b trial. *Lancet* **2016**, 387, 40–52.
3. Blauvelt, A; de Bruin-Weller, M; Gooderham, M; Cather, JC; Weisman, J; Pariser, D; Simpson, EL; Papp, KA; Hong, HC-H; Rubel, D; et al. Long-term management of moderate-to-severe atopic dermatitis with dupilumab and concomitant topical corticosteroids (LIBERTY AD CHRONOS): a 1-year, randomised, double-blinded, placebo-controlled, phase 3 trial. *Lancet* **2017**, 389, 2287–303.
4. Ruzicka, T; Hanifin, JM; Furue, M; Pulka, G; Mlynarczyk, I; Wollenberg, A; Galus, R; Etoh, T; Mihara, R; Yoshida, H; et al. Anti-Interleukin-31 Receptor A Antibody for Atopic Dermatitis. *N Engl J Med* **2017**, 376, 826-35.
5. De Bruin-Weller, M; Thaci, D; Smith, C; Radin, A; Zhang, R; Gadkari, A; Eckert, L; Hultsch, T; Pirozzi, G; Graham, NMH; et al. Dupilumab with concomitant topical corticosteroids in adult Patients with atopic dermatitis who are not adequately controlled with or are intolerant to cyclosporine a, or when this treatment is medically inadvisable: a placebo-controlled, randomized phase III clinical trial. *Br J Dermatol.* **2018**, 178, 1083-1101.
6. Simpson, EL; Parnes, JR; She, D; Crouch, S; Rees, W; Mo, M; Van der Merwe, R. Tezepelumab, an anti-thymic stromal lymphopoietin monoclonal antibody, in the treatment of moderate to severe atopic dermatitis: a randomized phase 2a clinical trial. *J Am Acad Dermatol* **2019**, 80, 1013-1021.

7. Wollenberg, A; Howell, MD; Guttman-Yassky, E; Silverberg, JI; Kell, C; Ranade, K; Moate, R; van der Merwe, E. Treatment of atopic dermatitis with tralokinumab, an anti-IL-13 mAb . *J Allergy Clin Immunol* **2019**, 143, 135-41.
8. Simpson, EL; Flohr, C; Eichenfield, LF; Bieber, T; Sofen, H; Taïeb, A; Owen, R; Putnam, W; Castro, M; DeBusk, K; et al. Efficacy and safety of lebrikizumab (an anti-IL-13 monoclonal antibody) in adults with moderate-to-severe atopic dermatitis inadequately controlled by topical corticosteroids: A randomized, placebo-controlled phase II trial (TREBLE). *J Am Acad Dermatol* **2018**, 78, 863-871.e11.
9. Guttman-Yassky, E; Silverberg, JI; Nemoto, O; Forman, SB; Wilke, A; Prescilla, R; de la Peña, A; Nunes, FP; Janes, J; Gamalo, M; et al. Baricitinib in adult patients with moderate-to-severe atopic dermatitis: A phase 2 parallel, double-blinded, randomized placebo-controlled multiple-dose study. *J Am Acad Dermatol* **2019**, 80, 913-921.e9.
10. Simpson, EL; Lacour, J-P; Spelman, L; Galimberti, R; Eichenfield, LF; Bissonnette, R; King, BA; Thyssen, JP; Silverberg, JI; Bieber, T; et al. Baricitinib in Patients with Moderate-to-Severe Atopic Dermatitis and Inadequate Response to Topical Corticosteroids: results from Two Randomised Monotherapy Phase 3 Trials. *Br J Dermatol* , 183, 242-245.
11. Gooderham, MJ; Forman, SB; Bissonnette, R; Beebe, JS; Zhang, W; Banfield, C; Zhu, L; Papacharalambous, J; Vincent, MS; Peeva, E. Efficacy and Safety of Oral Janus Kinase 1 Inhibitor Abrocitinib for Patients With Atopic Dermatitis: A Phase 2 Randomized Clinical Trial. *JAMA Dermatology* **2019**, 155, 1371-9.
12. Simpson, EL; Imafuku, S; Poulin, Y; Ungar, B; Zhou, L; Malik, K; Wen, H-C; Xu, H; Estrada, YD; Peng, X; et al. A Phase 2 Randomized Trial of Apremilast in Patients with Atopic Dermatitis. *J Invest Dermatol* **2019**, 139, 1063-1072.
13. Blauvelt, A; Simpson, EL; Tying, SK; Purcell, LA; Shumel, B; Petro, CD; Akinlade, B; Gadkari, A; Eckert, L; Graham, NMH; et al. Dupilumab does not affect correlates of vaccine-induced immunity: A randomized, placebo-controlled trial in adults with moderate-to-severe atopic dermatitis. *J Am Acad Dermatol* **2019**, 80, 158-167.e1.
14. Guttman-Yassky, E; Bissonnette, R; Ungar, B; Suarez-Fariñas, M; Ardeleanu, M; Esaki, H; Suprun, M; Estrada, Y; Xu, H; Peng, H; et. Dupilumab progressively improves systemic and cutaneous abnormalities in patients with atopic dermatitis. *J Allergy Clin Immunol*. **2019**, 143, 155-172
15. Wollenberg, A; Blauvelt, A; Guttman-Yassky, E; Worm, M; Lynde, C; Lacour, J-P; Spelman, L; Katoh, N; Saeki, H; Poulin, Y; et al. Tralokinumab for moderate-to-severe atopic dermatitis: results from two 52-week, randomized, double-blind, multicentre, placebo-controlled phase III trials (ECZTRA 1 and ECZTRA 2). *Br J Dermatol* **2021**, 184, 437-449.
16. Silverberg, JI; Toth, D; Bieber, T; Alexis, AF; Elewski, BE; Pink, AE; Hijnen, D; Jensen, TN; Bang, B; Olsen, CK; et al. Tralokinumab plus topical corticosteroids for the treatment of moderate-to-severe atopic dermatitis: results from the double-blind, randomized, multicentre, placebo-controlled phase III ECZTRA 3 trial. *Br J Dermatol* **2021**, 184, 450-463
17. Reich, K; Kabashima, K; Peris, K; Silverberg, JI; Eichenfield, LF; Bieber, T; Kaszuba, A; Kolodsick, J; Yang, FE; Gamalo, M; et al. Efficacy and Safety of Baricitinib Combined With Topical Corticosteroids for Treatment of Moderate to Severe Atopic Dermatitis: a Randomized Clinical Trial. *JAMA Dermatology* **2020**, 156, 1133,1143.
18. Simpson, EL; Sinclair, R; Forman, S; Wollenberg, A; Aschoff, R; Cork, M; Bieber, T; Thyssen, JP; Yosipovitch, G; Flohr, C; et al. Efficacy and safety of abrocitinib in adults and adolescents with moderate-to-severe atopic dermatitis (JADE MONO-1): a multicentre, double-blind, randomised, placebo-controlled, phase 3 trial. *Lancet* **2020**;396:255-66.
19. Silverberg, JI; Simpson, EL; Thyssen, JP; Gooderham, M; Chan, G; Feeney, C; Biswas, P; Valdez, H; Dibonaventura, M; Nduaka, C; et al. Efficacy and Safety of Abrocitinib in Patients with Moderate-to-Severe Atopic Dermatitis: a Randomized Clinical Trial. *JAMA Dermatology* **2020**, 156, 863-873.
20. Bieber, T; Simpson, EL; Silverberg, JI; Thaçi, D; Paul, C; Pink, AE; Kataoka, Y; Chu, C-Y; DiBonaventura, M; Rojo, R; et al. Abrocitinib versus Placebo or Dupilumab for Atopic Dermatitis. *N Engl J Med* **2021**, 384, 1101-12.
21. Bieber, T; Reich, K; Paul, C; Tsunemi, Y; Augustin, M; Lacour, J-P; Ghislain, P-D; Dutronc, Y; Liao, R; Gamalo, M; et al. Efficacy and Safety of Baricitinib in Combination With Topical Corticosteroids in Patients With Moderate-to-Severe Atopic Dermatitis Who Failed, Are Intolerant to, or Have Contraindication to Cyclosporine: Results From a Randomized, Placebo-Controlled, Ph. *Eur. Acad. Dermatology Venereol. (EADV Virtual)*, **2020**. <https://eadvvirtualcongress.org/> (accessed 29/07/2021)
22. Guttman-Yassky, E; Blauvelt, A; Eichenfield, LF; Paller, AS; Armstrong, AW; Drew, J; Gopalan, R; Simpson, EL. Efficacy and Safety of Lebrikizumab, a High-Affinity Interleukin 13 Inhibitor, in Adults with Moderate to Severe Atopic Dermatitis: a Phase 2b Randomized Clinical Trial. *JAMA Dermatology* **2020**, 156, 411-420.
23. Kabashima, K; Matsumura, T; Komazaki, H; Kawashima, M. Trial of Nemolizumab and Topical Agents for Atopic Dermatitis with Pruritus. *N Engl J Med* **2020**, 383, 141-50.
24. Silverberg, JI; Pinter, A; Pulka, G; Poulin, Y; Bouaziz, J-D; Wollenberg, A; Murrell, DF; Alexis, A; Lindsey, L; Ahmad, F; et al. Phase 2B randomized study of nemolizumab in adults with moderate-to-severe atopic dermatitis and severe pruritus. *J Allergy Clin Immunol* **2020**, 145, 173-82.
25. Guttman-Yassky, E; Teixeira, HD; Simpson, EL; Papp, KA; Pangan, AL; Blauvelt, A; Thaçi, D; Chu, CY; Hong, HC ho; Katoh, N; et al. Once-daily upadacitinib versus placebo in adolescents and adults with moderate-to-severe atopic dermatitis (Measure Up 1 and Measure Up 2): results from two replicate double-blind, randomised controlled phase 3 trials. *Lancet* **2021**, 397, 2151-68.
26. Reich, K; Teixeira, HD; de Bruin-Weller, M; Bieber, T; Soong, W; Kabashima, K; Werfel, T; Zeng, J; Huang, X; Hu, X; et al. Safety and efficacy of upadacitinib in combination with topical corticosteroids in adolescents and adults with moderate-to-severe atopic dermatitis (AD Up): results from a randomised, double-blind, placebo-controlled, phase 3 trial. *Lancet* **2021**, 397, 2169-81.
