# Supplementary material for: Short-Term Effectiveness and Safety of Biologics and Small Molecule Drugs for Moderate to Severe Atopic Dermatitis: A Systematic Review and Network Meta-Analysis
Source: MDPI journal article supplement (doi:10.3390/life11090927), 2021-09-06
Supplement: s1 [file s1]

Table S3. Separate indirect from direct evidence (SIDE) using back-calculation method

a) *EASI 75 monotherapy*

| comparison              | k | prop | nma   | direct | indir. | RoR   | z    | p-value |
|-------------------------|---|------|-------|--------|--------|-------|------|---------|
| ABRO100:ABRO200         | 3 | 1.00 | 0.46  | 0.46   | .      | .     | .    | .       |
| ABRO100:BARI2           | 0 | 0.00 | 1.86  | .      | 1.86   | .     | .    | .       |
| ABRO100:BARI4           | 0 | 0.00 | 1.40  | .      | 1.40   | .     | .    | .       |
| ABRO100:DUPI300Q2W      | 0 | 0.00 | 0.82  | .      | 0.82   | .     | .    | .       |
| ABRO100:LEBRI250Q2W     | 0 | 0.00 | 0.91  | .      | 0.91   | .     | .    | .       |
| ABRO100:NEMO60Q4W       | 0 | 0.00 | 3.24  | .      | 3.24   | .     | .    | .       |
| ABRO100:PBO             | 3 | 0.99 | 5.14  | 5.21   | 1.70   | 3.06  | 0.50 | 0.62    |
| ABRO100:TRALO300Q2W     | 0 | 0.00 | 1.74  | .      | 1.74   | .     | .    | .       |
| ABRO100:UPA15           | 0 | 0.00 | 0.47  | .      | 0.47   | .     | .    | .       |
| ABRO100:UPA30           | 0 | 0.00 | 0.27  | .      | 0.27   | .     | .    | .       |
| ABRO200:BARI2           | 0 | 0.00 | 4.08  | .      | 4.08   | .     | .    | .       |
| ABRO200:BARI4           | 0 | 0.00 | 3.07  | .      | 3.07   | .     | .    | .       |
| ABRO200:DUPI300Q2W      | 0 | 0.00 | 1.80  | .      | 1.80   | .     | .    | .       |
| ABRO200:LEBRI250Q2W     | 0 | 0.00 | 1.99  | .      | 1.99   | .     | .    | .       |
| ABRO200:NEMO60Q4W       | 0 | 0.00 | 7.11  | .      | 7.11   | .     | .    | .       |
| ABRO200:PBO             | 3 | 0.99 | 11.26 | 11.32  | 6.76   | 1.67  | 0.22 | 0.83    |
| ABRO200:TRALO300Q2W     | 0 | 0.00 | 3.82  | .      | 3.82   | .     | .    | .       |
| ABRO200:UPA15           | 0 | 0.00 | 1.03  | .      | 1.03   | .     | .    | .       |
| ABRO200:UPA30           | 0 | 0.00 | 0.60  | .      | 0.60   | .     | .    | .       |
| BARI2:BARI4             | 2 | 1.00 | 0.75  | 0.75   | .      | .     | .    | .       |
| BARI2:DUPI300Q2W        | 0 | 0.00 | 0.44  | .      | 0.44   | .     | .    | .       |
| BARI2:LEBRI250Q2W       | 0 | 0.00 | 0.49  | .      | 0.49   | .     | .    | .       |
| BARI2:NEMO60Q4W         | 0 | 0.00 | 1.74  | .      | 1.74   | .     | .    | .       |
| BARI2:PBO               | 2 | 1.00 | 2.76  | 2.76   | 2.53   | 1.09  | 0.02 | 0.99    |
| BARI2:TRALO300Q2W       | 0 | 0.00 | 0.94  | .      | 0.94   | .     | .    | .       |
| BARI2:UPA15             | 0 | 0.00 | 0.25  | .      | 0.25   | .     | .    | .       |
| BARI2:UPA30             | 0 | 0.00 | 0.15  | .      | 0.15   | .     | .    | .       |
| BARI4:DUPI300Q2W        | 0 | 0.00 | 0.59  | .      | 0.59   | .     | .    | .       |
| BARI4:LEBRI250Q2W       | 0 | 0.00 | 0.65  | .      | 0.65   | .     | .    | .       |
| BARI4:NEMO60Q4W         | 0 | 0.00 | 2.32  | .      | 2.32   | .     | .    | .       |
| BARI4:PBO               | 2 | 1.00 | 3.67  | 3.69   | 0.06   | 66.53 | 0.58 | 0.56    |
| BARI4:TRALO300Q2W       | 0 | 0.00 | 1.24  | .      | 1.24   | .     | .    | .       |
| BARI4:UPA15             | 0 | 0.00 | 0.34  | .      | 0.34   | .     | .    | .       |
| BARI4:UPA30             | 0 | 0.00 | 0.19  | .      | 0.19   | .     | .    | .       |
| DUPI300Q2W:LEBRI250Q2W  | 0 | 0.00 | 1.11  | .      | 1.11   | .     | .    | .       |
| DUPI300Q2W:NEMO60Q4W    | 0 | 0.00 | 3.95  | .      | 3.95   | .     | .    | .       |
| DUPI300Q2W:PBO          | 3 | 1.00 | 6.25  | 6.25   | .      | .     | .    | .       |
| DUPI300Q2W:TRALO300Q2W  | 0 | 0.00 | 2.12  | .      | 2.12   | .     | .    | .       |
| DUPI300Q2W:UPA15        | 0 | 0.00 | 0.57  | .      | 0.57   | .     | .    | .       |
| DUPI300Q2W:UPA30        | 0 | 0.00 | 0.33  | .      | 0.33   | .     | .    | .       |
| LEBRI250Q2W:NEMO60Q4W   | 0 | 0.00 | 3.57  | .      | 3.57   | .     | .    | .       |
| LEBRI250Q2W:PBO         | 1 | 1.00 | 5.65  | 5.65   | .      | .     | .    | .       |
| LEBRI250Q2W:TRALO300Q2W | 0 | 0.00 | 1.91  | .      | 1.91   | .     | .    | .       |

|                       |   |      |       |       |       |      |       |      |
|-----------------------|---|------|-------|-------|-------|------|-------|------|
| LEBRI250Q2W:UPA15     | 0 | 0.00 | 0.52  | .     | 0.52  | .    | .     | .    |
| LEBRI250Q2W:UPA30     | 0 | 0.00 | 0.30  | .     | 0.30  | .    | .     | .    |
| NEMO60Q4W:PBO         | 1 | 1.00 | 1.58  | 1.58  | .     | .    | .     | .    |
| NEMO60Q4W:TRALO300Q2W | 0 | 0.00 | 0.54  | .     | 0.54  | .    | .     | .    |
| NEMO60Q4W:UPA15       | 0 | 0.00 | 0.15  | .     | 0.15  | .    | .     | .    |
| NEMO60Q4W:UPA30       | 0 | 0.00 | 0.08  | .     | 0.08  | .    | .     | .    |
| TRALO300Q2W:PBO       | 2 | 1.00 | 2.95  | 2.95  | .     | .    | .     | .    |
| UPA15:PBO             | 2 | 1.00 | 10.89 | 10.89 | 10.53 | 1.03 | 0.01  | 0.99 |
| UPA30:PBO             | 2 | 1.00 | 18.90 | 18.81 | 77.16 | 0.24 | -0.53 | 0.60 |
| TRALO300Q2W:UPA15     | 0 | 0.00 | 0.27  | .     | 0.27  | .    | .     | .    |
| TRALO300Q2W:UPA30     | 0 | 0.00 | 0.16  | .     | 0.16  | .    | .     | .    |
| UPA15:UPA30           | 2 | 1.00 | 0.58  | 0.58  | .     | .    | .     | .    |

b) *EASI 75 Combination with TCS*

| comparison                | k | prop | nma  | direct | indir. | RoR  | z     | p-value |
|---------------------------|---|------|------|--------|--------|------|-------|---------|
| ABRO100TCS:ABRO200TCS     | 1 | 1.00 | 0.63 | 0.63   | .      | .    | .     | .       |
| ABRO100TCS:BARI2TCS       | 0 | 0.00 | 1.83 | .      | 1.83   | .    | .     | .       |
| ABRO100TCS:BARI4TCS       | 0 | 0.00 | 1.52 | .      | 1.52   | .    | .     | .       |
| ABRO100TCS:DUPI300Q2WTCS  | 1 | 0.90 | 0.76 | 0.80   | 0.48   | 1.67 | 0.87  | 0.38    |
| ABRO100TCS:PBOTCS         | 1 | 0.73 | 3.87 | 3.49   | 5.14   | 0.68 | -0.87 | 0.38    |
| ABRO100TCS:TEZE280Q2WTCS  | 0 | 0.00 | 3.06 | .      | 3.06   | .    | .     | .       |
| ABRO100TCS:TRALO300Q2WTCS | 0 | 0.00 | 1.69 | .      | 1.69   | .    | .     | .       |
| ABRO100TCS:UPA15TCS       | 0 | 0.00 | 0.74 | .      | 0.74   | .    | .     | .       |
| ABRO100TCS:UPA30TCS       | 0 | 0.00 | 0.41 | .      | 0.41   | .    | .     | .       |
| ABRO200TCS:BARI2TCS       | 0 | 0.00 | 2.89 | .      | 2.89   | .    | .     | .       |
| ABRO200TCS:BARI4TCS       | 0 | 0.00 | 2.40 | .      | 2.40   | .    | .     | .       |
| ABRO200TCS:DUPI300Q2WTCS  | 1 | 0.91 | 1.20 | 1.27   | 0.72   | 1.76 | 0.87  | 0.38    |
| ABRO200TCS:PBOTCS         | 1 | 0.75 | 6.12 | 5.52   | 8.37   | 0.66 | -0.87 | 0.38    |
| ABRO200TCS:TEZE280Q2WTCS  | 0 | 0.00 | 4.84 | .      | 4.84   | .    | .     | .       |
| ABRO200TCS:TRALO300Q2WTCS | 0 | 0.00 | 2.68 | .      | 2.68   | .    | .     | .       |
| ABRO200TCS:UPA15TCS       | 0 | 0.00 | 1.18 | .      | 1.18   | .    | .     | .       |
| ABRO200TCS:UPA30TCS       | 0 | 0.00 | 0.65 | .      | 0.65   | .    | .     | .       |
| BARI2TCS:BARI4TCS         | 3 | 0.99 | 0.83 | 0.84   | 0.30   | 2.81 | 0.45  | 0.65    |
| BARI2TCS:DUPI300Q2WTCS    | 0 | 0.00 | 0.41 | .      | 0.41   | .    | .     | .       |
| BARI2TCS:PBOTCS           | 3 | 0.99 | 2.12 | 2.11   | 2.63   | 0.80 | -0.12 | 0.90    |
| BARI2TCS:TEZE280Q2WTCS    | 0 | 0.00 | 1.67 | .      | 1.67   | .    | .     | .       |
| BARI2TCS:TRALO300Q2WTCS   | 0 | 0.00 | 0.93 | .      | 0.93   | .    | .     | .       |
| BARI2TCS:UPA15TCS         | 0 | 0.00 | 0.41 | .      | 0.41   | .    | .     | .       |
| BARI2TCS:UPA30TCS         | 0 | 0.00 | 0.22 | .      | 0.22   | .    | .     | .       |
| BARI4TCS:DUPI300Q2WTCS    | 0 | 0.00 | 0.50 | .      | 0.50   | .    | .     | .       |
| BARI4TCS:PBOTCS           | 3 | 1.00 | 2.55 | 2.56   | 0.54   | 4.75 | 0.26  | 0.79    |
| BARI4TCS:TEZE280Q2WTCS    | 0 | 0.00 | 2.01 | .      | 2.01   | .    | .     | .       |
| BARI4TCS:TRALO300Q2WTCS   | 0 | 0.00 | 1.12 | .      | 1.12   | .    | .     | .       |
| BARI4TCS:UPA15TCS         | 0 | 0.00 | 0.49 | .      | 0.49   | .    | .     | .       |
| BARI4TCS:UPA30TCS         | 0 | 0.00 | 0.27 | .      | 0.27   | .    | .     | .       |

|                              |   |      |      |      |      |   |   |   |
|------------------------------|---|------|------|------|------|---|---|---|
| DUPI300Q2WTCS:PBOTCS         | 3 | 1.00 | 5.10 | 5.10 | .    | . | . | . |
| DUPI300Q2WTCS:TEZE280Q2WTCS  | 0 | 0.00 | 4.03 | .    | 4.03 | . | . | . |
| DUPI300Q2WTCS:TRALO300Q2WTCS | 0 | 0.00 | 2.23 | .    | 2.23 | . | . | . |
| DUPI300Q2WTCS:UPA15TCS       | 0 | 0.00 | 0.98 | .    | 0.98 | . | . | . |
| DUPI300Q2WTCS:UPA30TCS       | 0 | 0.00 | 0.54 | .    | 0.54 | . | . | . |
| TEZE280Q2WTCS:PBOTCS         | 1 | 1.00 | 1.27 | 1.27 | .    | . | . | . |
| TRALO300Q2WTCS:PBOTCS        | 1 | 1.00 | 2.29 | 2.29 | .    | . | . | . |
| UPA15TCS:PBOTCS              | 1 | 1.00 | 5.20 | 5.20 | .    | . | . | . |
| UPA30TCS:PBOTCS              | 1 | 1.00 | 9.43 | 9.43 | .    | . | . | . |
| TEZE280Q2WTCS:TRALO300Q2WTCS | 0 | 0.00 | 0.55 | .    | 0.55 | . | . | . |
| TEZE280Q2WTCS:UPA15TCS       | 0 | 0.00 | 0.24 | .    | 0.24 | . | . | . |
| TEZE280Q2WTCS:UPA30TCS       | 0 | 0.00 | 0.13 | .    | 0.13 | . | . | . |
| TRALO300Q2WTCS:UPA15TCS      | 0 | 0.00 | 0.44 | .    | 0.44 | . | . | . |
| TRALO300Q2WTCS:UPA30TCS      | 0 | 0.00 | 0.24 | .    | 0.24 | . | . | . |
| UPA15TCS:UPA30TCS            | 1 | 1.00 | 0.55 | 0.55 | .    | . | . | . |

a) *IGA 0/1 monotherapy*

| comparison          | k | prop | nma  | direct | indir.    | RoR    | z     | p-value |
|---------------------|---|------|------|--------|-----------|--------|-------|---------|
| ABRO100:ABRO200     | 3 | 1    | 0.53 | 0.53   | .         | .      | .     | .       |
| ABRO100:BARI2       | 0 | 0    | 1.69 | .      | 1.69      | .      | .     | .       |
| ABRO100:BARI4       | 0 | 0    | 1.15 | .      | 1.15      | .      | .     | .       |
| ABRO100:DUPI300Q2W  | 0 | 0    | 0.71 | .      | 0.71      | .      | .     | .       |
| ABRO100:LEBRI250Q2W | 0 | 0    | 0.76 | .      | 0.76      | .      | .     | .       |
| ABRO100:NEMO60Q4W   | 0 | 0    | 4.22 | .      | 4.22      | .      | .     | .       |
| ABRO100:PBO         | 3 | 1    | 4.26 | 4.27   | 0.01      | 561.95 | 0.51  | 0.61    |
| ABRO100:TRALO300Q2W | 0 | 0    | 1.79 | .      | 1.79      | .      | .     | .       |
| ABRO100:UPA15       | 0 | 0    | 0.39 | .      | 0.39      | .      | .     | .       |
| ABRO100:UPA30       | 0 | 0    | 0.22 | .      | 0.22      | .      | .     | .       |
| ABRO200:BARI2       | 0 | 0    | 3.19 | .      | 3.19      | .      | .     | .       |
| ABRO200:BARI4       | 0 | 0    | 2.17 | .      | 2.17      | .      | .     | .       |
| ABRO200:DUPI300Q2W  | 0 | 0    | 1.35 | .      | 1.35      | .      | .     | .       |
| ABRO200:LEBRI250Q2W | 0 | 0    | 1.43 | .      | 1.43      | .      | .     | .       |
| ABRO200:NEMO60Q4W   | 0 | 0    | 7.98 | .      | 7.98      | .      | .     | .       |
| ABRO200:PBO         | 3 | 1    | 8.04 | 7.94   | 576261.05 | 0.00   | -1.28 | 0.20    |
| ABRO200:TRALO300Q2W | 0 | 0    | 3.39 | .      | 3.39      | .      | .     | .       |
| ABRO200:UPA15       | 0 | 0    | 0.73 | .      | 0.73      | .      | .     | .       |
| ABRO200:UPA30       | 0 | 0    | 0.42 | .      | 0.42      | .      | .     | .       |
| BARI2:BARI4         | 2 | 1    | 0.68 | 0.68   | .         | .      | .     | .       |
| BARI2:DUPI300Q2W    | 0 | 0    | 0.42 | .      | 0.42      | .      | .     | .       |
| BARI2:LEBRI250Q2W   | 0 | 0    | 0.45 | .      | 0.45      | .      | .     | .       |
| BARI2:NEMO60Q4W     | 0 | 0    | 2.50 | .      | 2.50      | .      | .     | .       |
| BARI2:PBO           | 2 | 1    | 2.52 | 2.52   | .         | .      | .     | .       |
| BARI2:TRALO300Q2W   | 0 | 0    | 1.06 | .      | 1.06      | .      | .     | .       |
| BARI2:UPA15         | 0 | 0    | 0.23 | .      | 0.23      | .      | .     | .       |
| BARI2:UPA30         | 0 | 0    | 0.13 | .      | 0.13      | .      | .     | .       |
| BARI4:DUPI300Q2W    | 0 | 0    | 0.62 | .      | 0.62      | .      | .     | .       |

|                         |   |      |       |       |      |      |      |      |
|-------------------------|---|------|-------|-------|------|------|------|------|
| BARI4:LEBRI250Q2W       | 0 | 0    | 0.66  | .     | 0.66 | .    | .    | .    |
| BARI4:NEMO60Q4W         | 0 | 0    | 3.67  | .     | 3.67 | .    | .    | .    |
| BARI4:PBO               | 2 | 1    | 3.70  | 3.70  | .    | .    | .    | .    |
| BARI4:TRALO300Q2W       | 0 | 0    | 1.56  | .     | 1.56 | .    | .    | .    |
| BARI4:UPA15             | 0 | 0    | 0.34  | .     | 0.34 | .    | .    | .    |
| BARI4:UPA30             | 0 | 0    | 0.19  | .     | 0.19 | .    | .    | .    |
| DUPI300Q2W:LEBRI250Q2W  | 0 | 0    | 1.06  | .     | 1.06 | .    | .    | .    |
| DUPI300Q2W:NEMO60Q4W    | 0 | 0    | 5.92  | .     | 5.92 | .    | .    | .    |
| DUPI300Q2W:PBO          | 3 | 1    | 5.96  | 5.96  | .    | .    | .    | .    |
| DUPI300Q2W:TRALO300Q2W  | 0 | 0    | 2.51  | .     | 2.51 | .    | .    | .    |
| DUPI300Q2W:UPA15        | 0 | 0    | 0.54  | .     | 0.54 | .    | .    | .    |
| DUPI300Q2W:UPA30        | 0 | 0    | 0.31  | .     | 0.31 | .    | .    | .    |
| LEBRI250Q2W:NEMO60Q4W   | 0 | 0    | 5.56  | .     | 5.56 | .    | .    | .    |
| LEBRI250Q2W:PBO         | 1 | 1    | 5.60  | 5.60  | .    | .    | .    | .    |
| LEBRI250Q2W:TRALO300Q2W | 0 | 0    | 2.36  | .     | 2.36 | .    | .    | .    |
| LEBRI250Q2W:UPA15       | 0 | 0    | 0.51  | .     | 0.51 | .    | .    | .    |
| LEBRI250Q2W:UPA30       | 0 | 0    | 0.29  | .     | 0.29 | .    | .    | .    |
| NEMO60Q4W:PBO           | 1 | 1    | 1.01  | 1.01  | .    | .    | .    | .    |
| NEMO60Q4W:TRALO300Q2W   | 0 | 0    | 0.42  | .     | 0.42 | .    | .    | .    |
| NEMO60Q4W:UPA15         | 0 | 0    | 0.09  | .     | 0.09 | .    | .    | .    |
| NEMO60Q4W:UPA30         | 0 | 0    | 0.05  | .     | 0.05 | .    | .    | .    |
| TRALO300Q2W:PBO         | 2 | 1    | 2.37  | 2.37  | .    | .    | .    | .    |
| UPA15:PBO               | 2 | 1    | 10.95 | 10.96 | 8.51 | 1.29 | 0.09 | 0.93 |
| UPA30:PBO               | 2 | 0.99 | 19.13 | 19.23 | 8.94 | 2.15 | 0.32 | 0.75 |
| TRALO300Q2W:UPA15       | 0 | 0    | 0.22  | .     | 0.22 | .    | .    | .    |
| TRALO300Q2W:UPA30       | 0 | 0    | 0.12  | .     | 0.12 | .    | .    | .    |
| UPA15:UPA30             | 2 | 1    | 0.57  | 0.57  | .    | .    | .    | .    |

d) IGA 0/1 Combination with TCS

| comparison                | k | prop | nma  | direct | indir. | RoR  | z     | p-value |
|---------------------------|---|------|------|--------|--------|------|-------|---------|
| ABRO100TCS:ABRO200TCS     | 1 | 1    | 0.60 | 0.60   | .      | .    | .     | .       |
| ABRO100TCS:BARI2TCS       | 0 | 0    | 1.92 | .      | 1.92   | .    | .     | .       |
| ABRO100TCS:BARI4TCS       | 0 | 0    | 1.38 | .      | 1.38   | .    | .     | .       |
| ABRO100TCS:DUPI300Q2WTCS  | 1 | 0.93 | 0.84 | 0.84   | 0.81   | 1.04 | 0.06  | 0.95    |
| ABRO100TCS:PBOTCS         | 1 | 0.59 | 3.63 | 3.59   | 3.69   | 0.97 | -0.06 | 0.95    |
| ABRO100TCS:TEZE280Q2WTCS  | 0 | 0    | 2.08 | .      | 2.08   | .    | .     | .       |
| ABRO100TCS:TRALO300Q2WTCS | 0 | 0    | 1.92 | .      | 1.92   | .    | .     | .       |
| ABRO100TCS:UPA15TCS       | 0 | 0    | 0.66 | .      | 0.66   | .    | .     | .       |
| ABRO100TCS:UPA30TCS       | 0 | 0    | 0.31 | .      | 0.31   | .    | .     | .       |
| ABRO200TCS:BARI2TCS       | 0 | 0    | 3.23 | .      | 3.23   | .    | .     | .       |
| ABRO200TCS:BARI4TCS       | 0 | 0    | 2.31 | .      | 2.31   | .    | .     | .       |
| ABRO200TCS:DUPI300Q2WTCS  | 1 | 0.93 | 1.41 | 1.42   | 1.36   | 1.04 | 0.06  | 0.95    |
| ABRO200TCS:PBOTCS         | 1 | 0.58 | 6.10 | 6.03   | 6.19   | 0.97 | -0.06 | 0.95    |
| ABRO200TCS:TEZE280Q2WTCS  | 0 | 0    | 3.48 | .      | 3.48   | .    | .     | .       |
| ABRO200TCS:TRALO300Q2WTCS | 0 | 0    | 3.23 | .      | 3.23   | .    | .     | .       |
| ABRO200TCS:UPA15TCS       | 0 | 0    | 1.11 | .      | 1.11   | .    | .     | .       |

|                              |   |      |       |       |      |      |      |      |
|------------------------------|---|------|-------|-------|------|------|------|------|
| ABRO200TCS:UPA30TCS          | 0 | 0    | 0.52  | .     | 0.52 | .    | .    | .    |
| BARI2TCS:BARI4TCS            | 3 | 1    | 0.72  | 0.72  | 0.43 | 1.66 | 0.15 | 0.88 |
| BARI2TCS:DUPI300Q2WTCS       | 0 | 0    | 0.44  | .     | 0.44 | .    | .    | .    |
| BARI2TCS:PBOTCS              | 3 | 0.99 | 1.89  | 1.90  | 0.97 | 1.96 | 0.25 | 0.80 |
| BARI2TCS:TEZE280Q2WTCS       | 0 | 0    | 1.08  | .     | 1.08 | .    | .    | .    |
| BARI2TCS:TRALO300Q2WTCS      | 0 | 0    | 1.00  | .     | 1.00 | .    | .    | .    |
| BARI2TCS:UPA15TCS            | 0 | 0    | 0.34  | .     | 0.34 | .    | .    | .    |
| BARI2TCS:UPA30TCS            | 0 | 0    | 0.16  | .     | 0.16 | .    | .    | .    |
| BARI4TCS:DUPI300Q2WTCS       | 0 | 0    | 0.61  | .     | 0.61 | .    | .    | .    |
| BARI4TCS:PBOTCS              | 3 | 1    | 2.64  | 2.63  | .    | .    | .    | .    |
| BARI4TCS:TEZE280Q2WTCS       | 0 | 0    | 1.51  | .     | 1.51 | .    | .    | .    |
| BARI4TCS:TRALO300Q2WTCS      | 0 | 0    | 1.40  | .     | 1.40 | .    | .    | .    |
| BARI4TCS:UPA15TCS            | 0 | 0    | 0.48  | .     | 0.48 | .    | .    | .    |
| BARI4TCS:UPA30TCS            | 0 | 0    | 0.22  | .     | 0.22 | .    | .    | .    |
| DUPI300Q2WTCS:PBOTCS         | 3 | 1    | 4.32  | 4.32  | .    | .    | .    | .    |
| DUPI300Q2WTCS:TEZE280Q2WTCS  | 0 | 0    | 2.47  | .     | 2.47 | .    | .    | .    |
| DUPI300Q2WTCS:TRALO300Q2WTCS | 0 | 0    | 2.29  | .     | 2.29 | .    | .    | .    |
| DUPI300Q2WTCS:UPA15TCS       | 0 | 0    | 0.79  | .     | 0.79 | .    | .    | .    |
| DUPI300Q2WTCS:UPA30TCS       | 0 | 0    | 0.37  | .     | 0.37 | .    | .    | .    |
| TEZE280Q2WTCS:PBOTCS         | 1 | 1    | 1.75  | 1.75  | .    | .    | .    | .    |
| TRALO300Q2WTCS:PBOTCS        | 2 | 1    | 1.89  | 1.89  | .    | .    | .    | .    |
| UPA15TCS:PBOTCS              | 1 | 1    | 5.47  | 5.47  | .    | .    | .    | .    |
| UPA30TCS:PBOTCS              | 1 | 1    | 11.78 | 11.78 | .    | .    | .    | .    |
| TEZE280Q2WTCS:TRALO300Q2WTCS | 0 | 0    | 0.93  | .     | 0.93 | .    | .    | .    |
| TEZE280Q2WTCS:UPA15TCS       | 0 | 0    | 0.32  | .     | 0.32 | .    | .    | .    |
| TEZE280Q2WTCS:UPA30TCS       | 0 | 0    | 0.15  | .     | 0.15 | .    | .    | .    |
| TRALO300Q2WTCS:UPA15TCS      | 0 | 0    | 0.34  | .     | 0.34 | .    | .    | .    |
| TRALO300Q2WTCS:UPA30TCS      | 0 | 0    | 0.16  | .     | 0.16 | .    | .    | .    |
| UPA15TCS:UPA30TCS            | 1 | 1    | 0.46  | 0.46  | .    | .    | .    | .    |

K: Number of studies providing direct evidence; prop: Direct evidence proportion; nma Estimated treatment effect (OR) in network meta-analysis; direct: Estimated treatment effect (OR) derived from direct evidence; indir.: Estimated treatment effect (OR) derived from indirect evidence; RoR: Ratio of Ratios (direct versus indirect); z: z-value of test for disagreement (direct versus indirect); p-value: p-value of test for disagreement (direct versus indirect)

ABRO100: Abrocitinib 100 mg daily; ABRO200: Abrocitinib 200 mg daily; BARI2: Baricitinib 2 mg daily; BARI4: Baricitinib 4 mg daily; DUPI300Q2W: Dupilumab 300 mg every other week; LEBRI250Q2W: Lebrikizumab 250 mg every other week; NEMO60Q4W: Nemolizumab 60 mg every 4 weeks; PBO: Placebo; TEZE280Q2W: Tezepalimab 280 mg every other week; TRALO300Q2W: Tralokinumab 300 mg every other week; UPA15: Upadacitinib 15 mg daily; UPA30: Upadacitinib 30 mg daily. TCS: Topical corticosteroids
