# Supplementary material for: Short-Term Effectiveness and Safety of Biologics and Small Molecule Drugs for Moderate to Severe Atopic Dermatitis: A Systematic Review and Network Meta-Analysis
Source: Life (Basel). 2021 Sep 6;11(9):927. doi: 10.3390/life11090927 (PMC8470048; doi:10.3390/life11090927)
Supplement: Supplementary file 1 [file life-11-00927-s001.zip › scriptR.txt]

###########################################################################
#FREQUENTIST NMA
###########################################################################

# Load library
library(netmeta)
library(readxl)
library(dmetar)

# Load Data (In this example EASI75 monotherapy)
DATA <- read_excel("EASI75_MONO.xlsx")
View(DATA)

# Convert and prepare data in long format
p1 <- pairwise(AgentID, event = R, n = N, studlab = Study, data = DATA, sm = "OR")
p1

# Conduct network meta-analysis 
net1 <- netmeta((p1), reference.group="PBO", comb.fixed=FALSE, comb.random=TRUE)

# Network graph
netgraph(net1, plastic = FALSE, points=FALSE, alpha.transparency = 0.5, thickness=TRUE, number.of.studies = TRUE, allfigures = TRUE)

# Print NMA data
print(net1, ref = "PBO", digits = 3)
netrank(net1, small.values = "bad")

# Forest graph
forest(net1, reference.group = "PBO", sortvar = TE, col.square = "blue", smlab = "Drugs vs. Placebo \n (IGA 0/1)")

# Print direct, indirect and nma result and graph
netsplit(net1)
forest(netsplit(net1), xlim=c(0.1,15))

# Matrix league for all treatment
netlg1 <-netleague(net1, net1)
write.csv(netlg1$random, "netleague.csv")

# Funnel graph
ord<-c("PBOTCS","ABRO100TCS","ABRO200TCS","BARI2TCS","BARI4TCS","DUPI300Q2WTCS","TEZE280Q2WTCS","TRALO300Q2WTCS","UPA15TCS","UPA30TCS")
funnel <- funnel(net1,
                 order = ord,
                 pch = 1:14,
                 col = c("blue"),
                 linreg = TRUE,
                 xlim = c(0.5, 2),
                 ylim = c(0.5, 0),
                 studlab = TRUE,
                 cex.studlab = 0.3,
                 legend=FALSE)

metabias(metagen(TE.adj, seTE, data = funnel))

###########################################################################
#BAYESIAN NMA
###########################################################################

# Load library
library(gemtc)
library(rjags)

# Load data with package requirements (In this example EASI75 monotherapy)
data <- read_excel("EASI75 - Gemtc.xlsx")

# Conduct network meta-analysis 
network <- mtc.network(data.ab = data)

# Built the Montecarlo model with 100,000 iterations
mcmc2 <-mtc.run(model, n.adapt = 5000, n.iter = 100000, thin = 10)

# Calculate probabilities of obtaining the best answer in the variable #Set 1 if higher values are preferred, -1 if lower values are preferred.
BestPb <- rank.probability(mcmc2, preferredDirection = 1)
write.csv(BestPb, "BestPb.csv")

# Calculate mean rank and graph
Mean.rank <-rank.quantiles(BestPb, probs=c("5o%"=0.5))
write.csv(MeanRank, "MeanRank.csv")
par(mar=c(2,2,2,2))
plot(BestPb, beside=TRUE, cex.names=0.5)
forest(relative.effect(mcmc2, t1 = "PBO"))

# Calculate SUCRA and graph
rank.probability<- rank.probability(mcmc2)
sucra(rank.probability)
sucraplot <-sucra(rank.probability)
write.csv(sucraplot, "sucra.csv")
plot(sucraplot)


# Get the results in terms of relative effects of the NMA
results <-relative.effect.table(mcmc2)
write.csv(results, "results.csv")
