# Supplementary material for: Short-Term Effectiveness and Safety of Biologics and Small Molecule Drugs for Moderate to Severe Atopic Dermatitis: A Systematic Review and Network Meta-Analysis
Source: Life (Basel). 2021 Sep 6;11(9):927. doi: 10.3390/life11090927 (PMC8470048; doi:10.3390/life11090927)
Supplement: Supplementary file 1 [file life-11-00927-s001.zip › supplementary_Articles_excluided.xlsx]

## Sheet: Hoja1
Author	Title	Inclusion/Exclusion and reason
	382 Dupilumab treatment provides continued improvements in signs and symptoms through week 100 in patients with moderate-to-severe atopic dermatitis who did not achieve â‰¥75% reduction in eczema area and severity index at week 16	NO:Subanalysis/pooled
JPRN-JapicCTI-205385,	A Phase III, Randomized, Double-blind, Placebo-controlled, Multi-Center Study to Evaluate the Efficacy and Safety of nemolizumab in Japanese Pediatric Atopic Dermatitis Patients with moderate to severe pruritus	NO:Only protocol without results
EUCTR2019-002932-10-ES,	A RANDOMIZED, DOUBLE-BLIND, PLACEBO-CONTROLLED TRIAL TO EVALUATE THE EFFICACY AND SAFETY OF LEBRIKIZUMAB IN PATIENTS WITH MODERATE-TO-SEVERE ATOPIC DERMATITIS	NO:Only protocol without results
Simpson, EL; Lacour, J-P; Spelman, L; Galimberti, R; Eichenfield, LF; Bissonnette, R; King, BA; Thyssen, JP; Silverberg, JI; Bieber, T; Kabashima, K; Tsunemi, Y; Costanzo, A; Guttman-Yassky, E; Beck, LA; Janes, JM; DeLozier, AM; Gamalo, M; Brinker, DR; Cardillo, T; Nunes, FP; Paller, AS; Wollenberg, A; Reich, K	Baricitinib in Patients with Moderate-to-Severe Atopic Dermatitis and Inadequate Response to Topical Corticosteroids: results from Two Randomised Monotherapy Phase 3 Trials	SI
NCT04392154,	Long-term Safety and Efficacy Study of Lebrikizumab in Patients With Moderate-to-Severe Atopic Dermatitis	NO:Only protocol without results
Silverberg, Jonathan I	Phase 2B randomized study of nemolizumab in adults with moderate-to-severe atopic dermatitis and severe pruritus	SI
NCT04345367,	Study of Abrocitinib Compared With Dupilumab in Adults With Moderate to Severe Atopic Dermatitis on Background Topical Therapy	NO:Only protocol without results
Wollenberg, A; Blauvelt, A; Guttman-Yassky, E; Worm, M; Lynde, C; Lacour, J-P; Spelman, L; Katoh, N; Saeki, H; Poulin, Y; Lesiak, A; Kircik, L; Cho, SH; Herranz, P; Cork, MJ; Peris, K; Steffensen, LA; Bang, B; Kuznetsova, A; Jensen, TN; Osterdal, ML; Simpson, EL	Tralokinumab for moderate-to-severe atopic dermatitis: results from two 52-week, randomized, double-blind, multicentre, placebo-controlled phase III trials (ECZTRA 1 and ECZTRA 2)	SI
Guttman-Yassky, Emma	Upadacitinib in adults with moderate to severe atopic dermatitis: 16-week results from a randomized, placebo-controlled trial	SI
NCT03809663,	A Dose Ranging Placebo-Controlled Double-Blind Study to Evaluate the Safety and Efficacy of Tezepelumab in Atopic Dermatitis	NO:Only protocol without results
EUCTR2018-001997-52-PL,	A Dose-Ranging, Placebo-Controlled, Double-Blind Study to Evaluate the Safety and Efficacy of Tezepelumab in Atopic Dermatitis	NO:Only protocol without results
Guttman-Yassky, Emma	Baricitinib in adult patients with moderate-to-severe atopic dermatitis: A phase 2 parallel, double-blinded, randomized placebo-controlled multiple-dose study	SI
Blauvelt, Andrew	Dupilumab does not affect correlates of vaccine-induced immunity: A randomized, placebo-controlled trial in adults with moderate-to-severe atopic dermatitis	SI
Guttman-Yassky, Emma	Dupilumab progressively improves systemic and cutaneous abnormalities in patients with atopic dermatitis	SI
Gooderham, Melinda J	Efficacy and Safety of Oral Janus Kinase 1 Inhibitor Abrocitinib for Patients With Atopic Dermatitis: A Phase 2 Randomized Clinical Trial	SI
Mihara, Ryosuke	Nemolizumab in moderate to severe atopic dermatitis: An exploratory analysis of work productivity and activity impairment in a randomized phase II study	NO:Subanalysis/pooled
Simpson, E L	Tezepelumab, an anti-thymic stromal lymphopoietin monoclonal antibody, in the treatment of moderate to severe atopic dermatitis: a randomized phase 2a clinical trial	SI
EUCTR2018-002264-57-SE,	This is a Phase 3, randomized, multi-center study that will evaluate upadacitinib versus dupilumab in adults (18 Ã¢â‚¬â€œ 75 years of age) with moderate to severe AD who are candidates for systemic therapy The study is comprised of a 35-day Screening Period, a 24-week blinded treatment period, and a 12-week Follow-up period	NO:Only protocol without results
NCT03736967,	2a Study to Assess the Efficacy and Safety of REGN3500 Monotherapy and Combination of REGN3500 Plus Dupilumab in Adult Patients With Moderate-to-Severe Atopic Dermatitis	NO:Only protocol without results
NCT03428100,	A Long-term Study of Baricitinib (LY3009104) With Topical Corticosteroids in Adults With Moderate to Severe Atopic Dermatitis That Are Not Controlled With Cyclosporine or for Those Who Cannot Take Oral Cyclosporine Because it is Not Medically Advisable	SI
EUCTR2017-002065-21-BE,	A phase 3 trial to evaluate the efficacy and safety of tralokinumab in combination with topical corticosteroid in adults with moderate to severe atopic dermatitis ECZTRA 3 (ECZema TRAlokinumab trial no 3)	NO: Summary, record already included in article
Baverel, Paul	A randomized, placebo-controlled, single ascending-dose study to assess the safety, tolerability, pharmacokinetics, and immunogenicity of subcutaneous tralokinumab in Japanese healthy volunteers	NO:Study Design
NCT03738397,	A Study to Compare Safety and Efficacy of Upadacitinib to Dupilumab in Adult Participants With Moderate to Severe Atopic Dermatitis	NO:Only protocol without results
de Bruin-Weller, M	Dupilumab with concomitant topical corticosteroid treatment in adults with atopic dermatitis with an inadequate response or intolerance to ciclosporin A or when this treatment is medically inadvisable: a placebo-controlled, randomized phase III clinical trial (LIBERTY AD CAFÉ)	SI
Simpson, Eric L	Efficacy and safety of lebrikizumab (an anti-IL-13 monoclonal antibody) in adults with moderate-to-severe atopic dermatitis inadequately controlled by topical corticosteroids: A randomized, placebo-controlled phase II trial (TREBLE)	SI
EUCTR2018-001383-28-AT,	Evaluation of Upadacitinib in Adolescent and Adult Patients with Moderate to Severe Atopic Dermatitis (Eczema) â€“ Measure Up 2	SI
NCT03569293,	Evaluation of Upadacitinib in Adolescent and Adult Patients With Moderate to Severe Atopic Dermatitis (Eczema)- Measure Up 1	SI
EUCTR2017-005125-20-FR,	Evaluation of Upadacitinib in Adolescent and Adult Patients with Moderate to Severe Atopic Dermatitis (Eczema)â€“ Measure Up 1	NO: Summary, record already included in article
EUCTR2017-005126-37-NL,	Evaluation of Upadacitinib in Combination with Topical Corticosteroids in Adolescent and Adult Patients with Moderate to Severe Atopic Dermatitis (Eczema) â€“ AD Up	SI
EUCTR2015-004458-16,	Randomized, double-blind, placebo-controlled study to investigate the efficacy and safety of dupilumab monotherapy in patients 12 to <18 years of age, with moderate-to-severe atopic dermatitis	NO:Population
NCT03526861,	Tralokinumab Monotherapy for Adolescent Subjects With Moderate to Severe Atopic Dermatitis - ECZTRA 6 (ECZema TRAlokinumab Trial no 6)	NO:Population
EUCTR2017-005143-33-DE,	Tralokinumab monotherapy for adolescent subjects with moderate-to-severe atopic dermatitis - ECZTRA 6	NO:Population
EUCTR2016-004200-65-ES,	A phase 3 trial to evaluate the efficacy and safety of tralokinumab in adults with moderate to severe atopic dermatitis	NO: Summary, record already included in article
EUCTR2016-004201-13-PL,	A phase 3 trial to evaluate the efficacy and safety of tralokinumab in adults with moderate to severe atopic dermatitis (ECZTRA 2)	NO: Summary, record already included in article
JPRN-JapicCTI-173740,	A Phase III, Randomized, Double-blind, Placebo-controlled, Multi-Center Study to Evaluate the Efficacy and Safety of nemolizumab in Japanese Atopic Dermatitis Patients with moderate to severe pruritus	NO:Only protocol without results
Blauvelt, Andrew	Long-term management of moderate-to-severe atopic dermatitis with dupilumab and concomitant topical corticosteroids (LIBERTY AD CHRONOS): a 1-year, randomised, double-blinded, placebo-controlled, phase 3 trial	SI
NCT03363854,	Tralokinumab in Combination With Topical Corticosteroids for Moderate to Severe Atopic Dermatitis - ECZTRA 3 (ECZema TRAlokinumab Trial no 3)	NO: Summary, record already included in article
NCT03131648,	Tralokinumab Monotherapy for Moderate to Severe Atopic Dermatitis - ECZTRA 1 (ECZema TRAlokinumab Trial no 1)	NO: Summary, record already included in article
NCT03160885,	Tralokinumab Monotherapy for Moderate to Severe Atopic Dermatitis - ECZTRA 2 (ECZema TRAlokinumab Trial no 2)	NO: Summary, record already included in article
Thaçi, Diamant	Efficacy and safety of dupilumab in adults with moderate-to-severe atopic dermatitis inadequately controlled by topical treatments: a randomised, placebo-controlled, dose-ranging phase 2b trial	SI
Nemoto, O	The first trial of CIM331, a humanized antihuman interleukin-31 receptor A antibody, in healthy volunteers and patients with atopic dermatitis to evaluate safety, tolerability and pharmacokinetics of a single dose in a randomized, double-blind, placebo-c	NO:Study Design
NCT02347176,	Phase 2 Study to Evaluate the Efficacy and Safety of Tralokinumab in Adults With Atopic Dermatitis	NO: Summary, record already included in article
Reich K., Lacour J.P., Costanzo A., Brinker D.R., Jose Rueda M., Nunes F.P., Issa M., Paller A., Silverberg J.I.	15057 Safety of baricitinib in patients with atopic dermatitis: Results of pooled data from two phase 3 monotherapy randomized, double-blind, placebo-controlled 16-week trials (BREEZE-AD1 and BREEZE-AD2)	NO:Subanalysis/pooled
Eichenfield L.F., Silverberg J.I., Carrascosa J.-M., Rubel D., Watts S., Casillas M., DeLozier A.M., Pierce E.	15058 The effect of baricitinib on daily and workplace activity from phase 3 trials BREEZE-AD1 and BREEZE-AD2 in adult patients with moderate to severe atopic dermatitis	NO:Subanalysis/pooled
Simpson E., Bissonnette R., Nunes F.P., Jose Rueda M., Paul C.	15059 Baricitinib, an oral reversible Janus kinase 1 and 2 inhibitor, for atopic dermatitis: Head and neck response across two phase 3 studies	NO:Subanalysis/pooled
Blauvelt A., Guttman E., Hussain I., Chen Z., Mina-Osorio P., Rossi A.B., Genzyme S., Bansal A.	15108 Long-term efficacy and safety of dupilumab in adolescents with atopic dermatitis: Results from an open-label extension trial (LIBERTY AD PED-OLE)	NO:Population
Simpson E.L., Gooderham M., King B., Taylor S.C., Rosmarin D., Tatulych S., Nduaka C., Williams D., Zhang W., Rojo R.	16405 Abrocitinib treatment in patients with moderate to severe atopic dermatitis: Consistency of efficacy responses from randomized, controlled phase 3 and phase 2b clinical trials	NO:Subanalysis/pooled
Deng C., Xie R., Banfield C., Gupta P., Feeney C., Rojo R., Peterson M.C.	170 Forecasting Phase 3 Dose-Response for Abrocitinib, an Oral Janus Kinase 1 Selective Inhibitor, Using Investigator's Global Assessment and Eczema Area and Severity Index	NO: Summary, record already included in article
Silverberg J.I., Calimlim B., Teixeira H.D., Wu M., Simpson E.L.	17021 The patient-reported burden of atopic dermatitis and its association with itch: Observations from the upadacitinib phase 2b randomized, placebo-controlled trial in moderate to severe atopic dermatitis	NO:Subanalysis/pooled
Simpson E.L., Imafuku S., Poulin Y., Ungar B., Zhou L., Malik K., Wen H.-C., Xu H., Estrada Y.D., Peng X., Chen M., Shah N., Suarez-Farinas M., Pavel A.B., Nograles K., Guttman-Yassky E.	A Phase 2 Randomized Trial of Apremilast in Patients with Atopic Dermatitis	SI
Wollenberg A., Howell M.D., Guttman-Yassky E., Silverberg J.I., Birrell C., Kell C., Dawson M., Van Der Merwe R.	A phase 2b dose-ranging efficacy and safety study of tralokinumab in adult patients with moderate to severe atopic dermatitis (AD)	SI
Simpson E.L., Bieber T., De Bruin-Weller M., Blauvelt A., Chen Z., Ardeleanu M., Shumel B., Akinlade B., Hultsch T.	Dupilumab efficacy in atopic dermatitis in four randomized phase 3 trials (liberty ad solo 1&2, chromos, cafe)	NO:Subanalysis/pooled
Paller A.S., Blauvelt A., Pariser D.M., Soong W., Hong H.C.-H., Zhang R., Eckert L., Gadkari A., Hultsch T., Bansal A.	Dupilumab for adolescents with moderate-to-severe atopic dermatitis: Results from a phase 3, randomized, double-blinded trial	NO:Population
Cork M.J., Thaçi D., Eichenfield L.F., Arkwright P.D., Hultsch T., Davis J.D., Zhang Y., Zhu X., Chen Z., Li M., Ardeleanu M., Teper A., Akinlade B., Gadkari A., Eckert L., Kamal M.A., Ruddy M., Graham N.M.H., Pirozzi G., Stahl N., DiCioccio A.T., Bansal A.	Dupilumab in adolescents with uncontrolled moderate-to-severe atopic dermatitis: results from a phase IIa open-label trial and subsequent phase III open-label extension	NO:Population
Bieber T.R.M., Thaci D., Graham N., Pirozzi G., Teper A., Ren H., Radin A.	Dupilumab monotherapy in adults with moderate-to-severe atopic dermatitis: A 12-week, randomized, double-blind, placebo-controlled study	SI
Merola J.F., Sidbury R., Wollenberg A., Chen Z., Zhang A., Shumel B., Rossi A.B.	Dupilumab prevents flares in adults with moderate-to-severe atopic dermatitis in a 52-week randomized controlled phase 3 trial	NO:Study Design
Reich K., Guttman-Yassky E., Beck L.A., Hu X., Pangan A.L., Teixeira H.D.	Early response to upadacitinib in moderate-to-severe atopic dermatitis: Results from a phase 2B randomized, placebo-controlled trial	NO: Summary, record already included in article
Bieber T., Kawashima M., Simpson E.L., Arima K., Kuroki A., Kimura T., Ardeleanu M.	Effect of dupilumab on Eczema Area Severity Index by body region in patients with moderate-to-severe atopic dermatitis in a phase 2b study	NO: Summary, record already included in article
De Bruin-Weller M.S., Guttman-Yassky E., Forman S.B., Bodhani A., Chen S., Pangan A.L., Teixeira H.D.	Effects of upadacitinib on atopic dermatitis signs, symptoms and patient-reported outcomes from a phase IIb randomized, placebo-controlled trial	NO: Summary, record already included in article
Simpson E.L., Sinclair R., Forman S., Wollenberg A., Aschoff R., Cork M., Bieber T., Thyssen J.P., Yosipovitch G., Flohr C., Magnolo N., Maari C., Feeney C., Biswas P., Tatulych S., Valdez H., Rojo R.	Efficacy and safety of abrocitinib in adults and adolescents with moderate-to-severe atopic dermatitis (JADE MONO-1): a multicentre, double-blind, randomised, placebo-controlled, phase 3 trial	SI
Silverberg J.I., Simpson E.L., Thyssen J.P., Gooderham M., Chan G., Feeney C., Biswas P., Valdez H., Dibonaventura M., Nduaka C., Rojo R.	Efficacy and Safety of Abrocitinib in Patients with Moderate-to-Severe Atopic Dermatitis: A Randomized Clinical Trial	SI
Reich K., Kabashima K., Peris K., Silverberg J.I., Eichenfield L.F., Bieber T., Kaszuba A., Kolodsick J., Yang F.E., Gamalo M., Brinker D.R., Delozier A.M., Janes J.M., Nunes F.P., Thyssen J.P., Simpson E.L.	Efficacy and Safety of Baricitinib Combined with Topical Corticosteroids for Treatment of Moderate to Severe Atopic Dermatitis: A Randomized Clinical Trial	SI
Guttman-Yassky E., Blauvelt A., Eichenfield L.F., Paller A.S., Armstrong A.W., Drew J., Gopalan R., Simpson E.L.	Efficacy and Safety of Lebrikizumab, a High-Affinity Interleukin 13 Inhibitor, in Adults with Moderate to Severe Atopic Dermatitis: A Phase 2b Randomized Clinical Trial	SI
Guttman-Yassky E., Silverberg J.I., Papp K.A., Hu X., Gu Y., Pangan A., Teixeira H.D., Reich K.	Efficacy and safety of upadacitinib treatment over 32 weeks for patients with atopic dermatitis from a Phase IIb, randomized, placebo-controlled trial	NO:Study Design
Komjathy S., Griffiths J., Parnes J.R.	Key learnings and the informed design of a randomized, placebo-controlled, dose-ranging phase 2b study to evaluate the efficacy of tezepelumab in moderate-to-severe Atopic Dermatitis	NO:Only protocol without results
Silverberg J.I., Toth D., Bieber T., Alexis A.F., Elewski B.E., Pink A.E., Hijnen D., Jensen T.N., Bang B., Olsen C.K., Kurbasic A., Weidinger S.	Tralokinumab plus topical corticosteroids for the treatment of moderate-to-severe atopic dermatitis: results from the double-blind, randomized, multicentre, placebo-controlled phase III ECZTRA 3 trial	SI
Silverberg J.I., Kragh N., Guttman-Yassky E., Wollenberg A.	Tralokinumab with topical corticosteroids (TCS) improves health-related quality of life (HRQoL) in adults with moderate-to-severe atopic dermatitis (AD): A Phase 2b, randomized, double-blind, placebo-controlled study	NO:Subanalysis/pooled
Beck L.A., Mette D., Zhang Q., Akinlade B., Staudinger H., Graham N., Pirozzi G., Ardeleanu M.	Treatment interruption did not impact efficacy or long-term safety of dupilumab: A phase 3 open-label trial	NO:Subanalysis/pooled
Beck L., Hong C., Hu X., Chen S., Calimlim B., Teixeira H., Guttman-Yassky E.	UPADACITINIB EFFECT ON PRURITUS IN MODERATE-TO-SEVERE ATOPIC DERMATITIS; FROM A PHASE 2B RANDOMIZED, PLACEBO-CONTROLLED TRIAL	NO:Subanalysis/pooled
Hong C.-H., Wu T., Calimlim B., Teixeira H., De Bruin-Weller M.	Upadacitinib improved patient-reported pruritus in moderate-to-severe atopic dermatitis: Results from a phase 2B randomized, placebo-controlled trial	NO:Subanalysis/pooled
Reich K., Liu M., Calimlim B., Teixeira H.D., Silverberg J.I.	Upadacitinib improved patient-reported sleep in moderate-to-severe atopic dermatitis: Results from a phase 2b randomized, placebo-controlled trial	NO:Subanalysis/pooled
E.L. Simpson, T. Bieber, E. Guttman‑Yassky	Two Phase 3 Trials of Dupilumab versus Placebo in Atopic Dermatitis	SI
